# Supplementary material for: Impact of COVID-19 Pandemic on Thyroid Surgery in a University Hospital in South Korea
Source: MDPI journal article supplement (doi:10.3390/cancers14174338), 2022-09-05
Supplement: s1 [file s1]

Supplementary Table S1. Numbers of outpatients in author's institution and COVID-19 patients in Korea.

| Year | Month | New patients | Follow up patients | Total outpatients | Numbers of COVID-19 patients in Korea | Correlation* | p-value |
|------|-------|--------------|--------------------|-------------------|---------------------------------------|--------------|---------|
| 2019 | 1     | 109          | 388                | 497               | 0                                     | NA           | NA      |
|      | 2     | 106          | 327                | 433               | 0                                     |              |         |
|      | 3     | 104          | 468                | 572               | 0                                     |              |         |
|      | 4     | 87           | 472                | 559               | 0                                     |              |         |
|      | 5     | 121          | 461                | 582               | 0                                     |              |         |
|      | 6     | 108          | 442                | 550               | 0                                     |              |         |
|      | 7     | 121          | 511                | 632               | 0                                     |              |         |
|      | 8     | 107          | 565                | 672               | 0                                     |              |         |
|      | 9     | 100          | 442                | 542               | 0                                     |              |         |
|      | 10    | 107          | 520                | 627               | 0                                     |              |         |
|      | 11    | 114          | 504                | 618               | 0                                     |              |         |
|      | 12    | 119          | 484                | 603               | 0                                     |              |         |
| 2020 | 1     | 105          | 563                | 668               | 11                                    | -0.17        | 0.598   |
|      | 2     | 80           | 477                | 557               | 2920                                  |              |         |
|      | 3     | 75           | 358                | 433               | 6855                                  |              |         |
|      | 4     | 55           | 315                | 370               | 979                                   |              |         |
|      | 5     | 88           | 322                | 410               | 703                                   |              |         |
|      | 6     | 60           | 374                | 434               | 1331                                  |              |         |
|      | 7     | 84           | 438                | 522               | 1506                                  |              |         |
|      | 8     | 77           | 361                | 438               | 5641                                  |              |         |
|      | 9     | 58           | 309                | 367               | 3865                                  |              |         |
|      | 10    | 93           | 353                | 446               | 2700                                  |              |         |
|      | 11    | 92           | 371                | 463               | 7688                                  |              |         |
|      | 12    | 72           | 368                | 440               | 26527                                 |              |         |

|      |    |     |     |     |        |       |       |
|------|----|-----|-----|-----|--------|-------|-------|
| 2021 | 1  | 62  | 329 | 391 | 17471  | 0.668 | 0.018 |
|      | 2  | 75  | 324 | 399 | 11467  |       |       |
|      | 3  | 75  | 467 | 542 | 13415  |       |       |
|      | 4  | 101 | 386 | 487 | 18927  |       |       |
|      | 5  | 76  | 359 | 435 | 18331  |       |       |
|      | 6  | 107 | 425 | 532 | 16623  |       |       |
|      | 7  | 81  | 359 | 440 | 41374  |       |       |
|      | 8  | 87  | 416 | 503 | 53007  |       |       |
|      | 9  | 87  | 394 | 481 | 59859  |       |       |
|      | 10 | 109 | 393 | 502 | 53421  |       |       |
|      | 11 | 100 | 415 | 515 | 82527  |       |       |
|      | 12 | 138 | 472 | 610 | 183604 |       |       |

---

Reference: Center Disease Control Headquarters in Korea, <http://ncov.mohw.go.kr/index.jsp>

\* Pearson's product-moment correlation between total outpatients and numbers of COVID-19 patients
